# Supplementary material for: A site energy distribution function for the characterization of the continuous distribution of binding sites for gases on a heterogeneous surface
Source: Royal Society of Chemistry journal article supplement (doi:10.1039/c1ra00564b), 2011-11-22
Supplement: c1ra00564b.pdf [file c1ra00564b.pdf]

## Supplementary for 'A site energy distribution function for the characterization of the continuous distribution of binding sites for gases on heterogeneous surface'

K. Vasanth Kumar\*, Ana Maria Silvestre-Albero and F. Rodriguez-Reinoso

Laboratorio de Materiales Avanzados, Departamento de Química Inorgánica,  
Universidad de Alicante, Apartado 99. 030080 Alicante. Spain.

\*E-mail: vasanth@ua.es

### Derivation of the binding site energy distribution function for Jensen-Seaton isotherm

The binding site energy distribution, according the *condensation approximation method* is given by the differentiation of the Jensen-Seaton isotherm,  $q(E^*)$ , with respect to the binding site energy,  $E^*$ , of the adsorption sites on the adsorbent surface,  $-dq(E^*)/dE^*$ , given by

$$\frac{d}{dE^*} \left( Kp_s \exp\left(-\frac{E^*}{R}\right) \left( \left( \frac{Kp_s \exp\left(-\frac{E^*}{R}\right)}{a \left( 1 + kp_s \exp\left(-\frac{E^*}{R}\right) \right)} + 1 \right)^c \right)^{-1/c} \right) \quad (\text{Eq 1})$$

Let  $u \exp\left(-\frac{E^*}{R}\right)$  and  $v = \left( \left( \frac{Kp_s \exp\left(-\frac{E^*}{R}\right)}{a \left( 1 + kp_s \exp\left(-\frac{E^*}{R}\right) \right)} + 1 \right)^c \right)^{-1/c}$  ; applying the product

rule,  $\frac{d(uv)}{dx} = \frac{d(u)}{dx}v + \frac{d(v)}{dx}u$ , we get

$$= \left( Kp_s \exp\left(-\frac{E^*}{RT}\right) \left( \frac{Kp_s \exp\left(-\frac{E^*}{RT}\right)}{a \left(1 + kp_s \exp\left(-\frac{E^*}{RT}\right)\right)} + 1 \right)^c \right)^{-1/c} \frac{d}{dE^*} \left( \exp\left(-\frac{E^*}{RT}\right) \right) + \quad (\text{Eq 2})$$

$$\exp\left(-\frac{E^*}{RT}\right) \frac{d}{dE^*} \left( \frac{Kp_s \exp\left(-\frac{E^*}{RT}\right)}{a \left(1 + kp_s \exp\left(-\frac{E^*}{RT}\right)\right)} + 1 \right)^{-1/c}$$

if,  $u = -E^*/RT$ , applying the chain rule,  $\frac{de^u}{dx} = e^u \frac{du}{dx}$ , and simplifying, we get

$$= Kp_s \left( \exp\left(-\frac{E^*}{RT}\right) \frac{d}{dE^*} \left( \frac{Kp_s \exp\left(-\frac{E^*}{RT}\right)}{a \left(1 + kp_s \exp\left(-\frac{E^*}{RT}\right)\right)} + 1 \right)^{-1/c} \right) - \quad (\text{Eq 3})$$

$$\exp\left(-\frac{E^*}{RT}\right) \left( \frac{Kp_s \exp\left(-\frac{E^*}{RT}\right)}{a \left(1 + kp_s \exp\left(-\frac{E^*}{RT}\right)\right)} + 1 \right)^{-1/c}$$

if,  $u = \left( \frac{Kp_s \exp\left(-\frac{E^*}{RT}\right)}{a \left(1 + kp_s \exp\left(-\frac{E^*}{RT}\right)\right)} + 1 \right)^c$  and  $n = -1/c$ , from the chain rule,  $\frac{du^n}{dx} = nu^{n-1} \frac{du}{dx}$

and simplifying the resulting expression, we get

$$\begin{aligned}
 &= Kp_s \left[ \frac{\exp\left(-\frac{E^*}{RT}\right) \left( \frac{Kp_s \exp\left(-\frac{E^*}{RT}\right)}{a \left(1 + kp_s \exp\left(-\frac{E^*}{RT}\right)\right)} + 1 \right)^{\frac{1}{c}-1}}{c} \frac{d}{dE^*} \left( \frac{Kp_s \exp\left(-\frac{E^*}{RT}\right)}{a \left(1 + kp_s \exp\left(-\frac{E^*}{RT}\right)\right)} \right)^c - \right. \\
 &\left. \frac{\exp\left(-\frac{E^*}{RT}\right) \left( \frac{Kp_s \exp\left(-\frac{E^*}{RT}\right)}{a \left(1 + kp_s \exp\left(-\frac{E^*}{RT}\right)\right)} + 1 \right)^{-1/c}}{r} \right] \quad (Eq\ 4)
 \end{aligned}$$

if  $u = \frac{Kp_s \exp\left(-\frac{E^*}{RT}\right)}{a \left(1 + kp_s \exp\left(-\frac{E^*}{RT}\right)\right)}$  and  $n = c$ , then from the chain rule  $\frac{du^n}{dx} = nu^{n-1} \frac{du}{dx}$

$$\begin{aligned}
 &= Kp_s \left[ \frac{\exp\left(-\frac{E^*}{RT}\right) \left( \frac{Kp_s \exp\left(-\frac{E^*}{RT}\right)}{a \left(1 + kp_s \exp\left(-\frac{E^*}{RT}\right)\right)} \right)^{c-1} \left( \frac{Kp_s \exp\left(-\frac{E^*}{RT}\right)}{a \left(1 + kp_s \exp\left(-\frac{E^*}{RT}\right)\right)} + 1 \right)^{\frac{1}{c}-1} \frac{d}{dE^*} \left( \frac{Kp_s \exp\left(-\frac{E^*}{RT}\right)}{a \left(1 + kp_s \exp\left(-\frac{E^*}{RT}\right)\right)} \right)^c - \right. \\
 &\left. \frac{\exp\left(-\frac{E^*}{RT}\right) \left( \frac{Kp_s \exp\left(-\frac{E^*}{RT}\right)}{a \left(1 + kp_s \exp\left(-\frac{E^*}{RT}\right)\right)} + 1 \right)^{-1/c}}{RT} \right]
 \end{aligned}$$

----- (Eq 5)

$$\text{if } u = \exp\left(-\frac{E^*}{RT}\right) \text{ and } v = 1 + kp_s \exp\left(-\frac{E^*}{RT}\right); \text{ Let } X' = Kp_s \exp\left(-\frac{E^*}{RT}\right);$$

$$Y' = \frac{Kp_s \exp\left(-\frac{E^*}{RT}\right)}{a\left(1 + kp_s \exp\left(-\frac{E^*}{RT}\right)\right)}; E' = \exp\left(-\frac{E^*}{RT}\right)$$

$$= Kp_s \left[ \frac{\left( X' \left( (Y')^{c-1} (Y')^c + 1 \right)^{\frac{1}{c}-1} \right) \left( (kp_s E' + 1) \frac{d}{dE^*} (E') - E' \frac{d}{dE^*} (bp_s E' + 1) \right)}{a(1 + kp_s E')^2} - \frac{E' \left( \left( \frac{X'}{a(1 + kp_s E')} \right)^c + 1 \right)^{-1/c}}{RT} \right] \quad (\text{Eq } 6)$$

if  $u = -E^*/RT$ , and introducing the parameter, and then applying the chain rule,  
 $\frac{de^u}{dx} = e^u \frac{du}{dx}$ , and rearranging the resulting expression and substituting the appropriate parameters and simplifying, we get

$$f(E^*) = \frac{X \left( (Y)^c + 1 \right)^{\frac{c+1}{c}} \left( Z \left( (Y)^c + 1 \right) + 1 \right)}{A} \quad (\text{Eq } 7)$$

where,

$$X = \exp\left(-\frac{E^*}{RT}\right) Kp_s \quad (\text{Eq } 8)$$

$$Y = \frac{X}{kp_s a \exp\left(-\frac{E^*}{RT}\right) + a} \quad (\text{Eq } 9)$$

$$Z = kp_s \exp\left(-\frac{E^*}{RT}\right) \quad (\text{Eq } 10)$$

$$A = k p_s \exp\left(-\frac{E^*}{RT}\right) RT + RT \quad (\text{Eq } 11)$$
